# Supplementary material
Source: PubMed Central journal article supplement (PMC9840686)
Supplement: NIHMS1838154-supplement-1838154_RS.pdf [file NIHMS1838154-supplement-1838154_RS.pdf]

## Reporting Summary

Nature Research wishes to improve the reproducibility of the work that we publish. This form provides structure for consistency and transparency in reporting. For further information on Nature Research policies, see our [Editorial Policies](#) and the [Editorial Policy Checklist](#).

### Statistics

For all statistical analyses, confirm that the following items are present in the figure legend, table legend, main text, or Methods section.

n/a Confirmed

- The exact sample size ( $n$ ) for each experimental group/condition, given as a discrete number and unit of measurement
- A statement on whether measurements were taken from distinct samples or whether the same sample was measured repeatedly
- The statistical test(s) used AND whether they are one- or two-sided  
*Only common tests should be described solely by name; describe more complex techniques in the Methods section.*
- A description of all covariates tested
- A description of any assumptions or corrections, such as tests of normality and adjustment for multiple comparisons
- A full description of the statistical parameters including central tendency (e.g. means) or other basic estimates (e.g. regression coefficient) AND variation (e.g. standard deviation) or associated estimates of uncertainty (e.g. confidence intervals)
- For null hypothesis testing, the test statistic (e.g.  $F$ ,  $t$ ,  $r$ ) with confidence intervals, effect sizes, degrees of freedom and  $P$  value noted  
*Give  $P$  values as exact values whenever suitable.*
- For Bayesian analysis, information on the choice of priors and Markov chain Monte Carlo settings
- For hierarchical and complex designs, identification of the appropriate level for tests and full reporting of outcomes
- Estimates of effect sizes (e.g. Cohen's  $d$ , Pearson's  $r$ ), indicating how they were calculated

*Our web collection on [statistics for biologists](#) contains articles on many of the points above.*

### Software and code

Policy information about [availability of computer code](#)

Data collection

Data analysis

For manuscripts utilizing custom algorithms or software that are central to the research but not yet described in published literature, software must be made available to editors and reviewers. We strongly encourage code deposition in a community repository (e.g. GitHub). See the Nature Research [guidelines for submitting code & software](#) for further information.

### Data

Policy information about [availability of data](#)

All manuscripts must include a [data availability statement](#). This statement should provide the following information, where applicable:

- Accession codes, unique identifiers, or web links for publicly available datasets
- A list of figures that have associated raw data
- A description of any restrictions on data availability

## Field-specific reporting

Please select the one below that is the best fit for your research. If you are not sure, read the appropriate sections before making your selection.

Life sciences  Behavioural & social sciences  Ecological, evolutionary & environmental sciences

For a reference copy of the document with all sections, see [nature.com/documents/nr-reporting-summary-flat.pdf](https://www.nature.com/documents/nr-reporting-summary-flat.pdf)

## Life sciences study design

All studies must disclose on these points even when the disclosure is negative.

|                 |                                                                                                                                                                                       |
|-----------------|---------------------------------------------------------------------------------------------------------------------------------------------------------------------------------------|
| Sample size     | Experiments were performed with at least 3 independently prepared samples for statistical tests.                                                                                      |
| Data exclusions | No data were excluded from analyses.                                                                                                                                                  |
| Replication     | The experiments were repeated for at least three times independently.                                                                                                                 |
| Randomization   | Not relevant to study, 1) no live organisms or human participants or clinical research were involved; 2) no large number of samples to select from that would lead to selection bias. |
| Blinding        | Samples subjected to mass spectrometric analysis, flow cytometry, and DNA sequencing were blinded to the experimentalist.                                                             |

## Reporting for specific materials, systems and methods

We require information from authors about some types of materials, experimental systems and methods used in many studies. Here, indicate whether each material, system or method listed is relevant to your study. If you are not sure if a list item applies to your research, read the appropriate section before selecting a response.

### Materials & experimental systems

|                                     |                                                           |
|-------------------------------------|-----------------------------------------------------------|
| n/a                                 | Included in the study                                     |
| <input type="checkbox"/>            | <input checked="" type="checkbox"/> Antibodies            |
| <input type="checkbox"/>            | <input checked="" type="checkbox"/> Eukaryotic cell lines |
| <input checked="" type="checkbox"/> | <input type="checkbox"/> Palaeontology and archaeology    |
| <input checked="" type="checkbox"/> | <input type="checkbox"/> Animals and other organisms      |
| <input checked="" type="checkbox"/> | <input type="checkbox"/> Human research participants      |
| <input checked="" type="checkbox"/> | <input type="checkbox"/> Clinical data                    |
| <input checked="" type="checkbox"/> | <input type="checkbox"/> Dual use research of concern     |

### Methods

|                                     |                                                    |
|-------------------------------------|----------------------------------------------------|
| n/a                                 | Included in the study                              |
| <input checked="" type="checkbox"/> | <input type="checkbox"/> ChIP-seq                  |
| <input type="checkbox"/>            | <input checked="" type="checkbox"/> Flow cytometry |
| <input checked="" type="checkbox"/> | <input type="checkbox"/> MRI-based neuroimaging    |

## Antibodies

|                 |                                                                                                                                                                                                                                                                                                                                                                                                              |
|-----------------|--------------------------------------------------------------------------------------------------------------------------------------------------------------------------------------------------------------------------------------------------------------------------------------------------------------------------------------------------------------------------------------------------------------|
| Antibodies used | HRP conjugated anti-Hisx6 tag antibody was purchased from Proteintech (Catalog number: HRP-66005, clone name: 1B7G5, Lot number: 21004183). Streptavidin-HRP was purchased from Thermo Fisher Scientific (Catalog number: PI21130, Lot number: VC300763). Alexa Fluor 647 conjugated Hisx6 tag antibody was purchased from Thermo Fisher Scientific (Catalog number: MA1-135-A647, clone name: 4E3D10H2/E3). |
| Validation      | The specificity of the antibodies (HRP conjugated anti-Hisx6 tag antibody and Alexa Fluor 647 conjugated Hisx6 tag antibody) was verified by expressing a model GFP protein with the tag appended at the C-terminus in bacteria and in mammalian cells, followed with western blotting of cell extracts.                                                                                                     |

## Eukaryotic cell lines

Policy information about [cell lines](#)

|                                                                   |                                                                                                                                                                                                         |
|-------------------------------------------------------------------|---------------------------------------------------------------------------------------------------------------------------------------------------------------------------------------------------------|
| Cell line source(s)                                               | BT-20 (CCLZR058), MCF-7 (CCLZR278), SK-MEL-28 (CCLZR370) were purchased from UCSF Cell and Genome Engineering Core (CGEC). NK-92 (CRL-2407) was purchased from American Type Culture Collection (ATCC). |
| Authentication                                                    | Cell lines were authenticated at UCSF Cell and Genome Engineering Core or ATCC and used immediately following purchase.                                                                                 |
| Mycoplasma contamination                                          | All cell lines tested negative for mycoplasma contamination.                                                                                                                                            |
| Commonly misidentified lines (See <a href="#">ICLAC</a> register) | Not used in this study.                                                                                                                                                                                 |

### Plots

Confirm that:

- The axis labels state the marker and fluorochrome used (e.g. CD4-FITC).
- The axis scales are clearly visible. Include numbers along axes only for bottom left plot of group (a 'group' is an analysis of identical markers).
- All plots are contour plots with outliers or pseudocolor plots.
- A numerical value for number of cells or percentage (with statistics) is provided.

### Methodology

Sample preparation

Cell lines were purchased from ATCC. Staining of cells were described in detail in Supplementary Information.

Instrument

BD LSRFortessa cell analyzer, Model No. 649225

Software

FlowJo

Cell population abundance

No cell sorting was carried out. We just used flow cytometry to quantitatively measure the fluorescence intensity of cells.

Gating strategy

Negative control cell samples were used to define the gate for positive signal.

- Tick this box to confirm that a figure exemplifying the gating strategy is provided in the Supplementary Information.
